# Supplementary material
Source: Research Square preprint supplement (doi:10.21203/rs.3.rs-9582410/v1)
Supplement: Supplementary file 1 [file 1a51e74ee530cdfbd9363aef.docx]

**Supplementary Material**

**S0. Guide for Readers**

How to use this Supplementary Material
This supplementary material is organized for selective reading and is not intended to be read sequentially.
Readers may navigate directly to sections based on their interests:

Data underlying the main results

→ **S1**
(Data underlying the main results)

Distributional positioning of acupuncture within the structural space

→ **S2**

(Descriptive representation of TLR across interventions)

Alternative representations of factor-based visualization

→ **S3**

(Comparator-structure variations and nomogram-based visualization)

Statistical definition and computational procedure of TLR

→ **S4**

(Formal definition and step-by-step re-expression example)

Statistical properties and consistency with existing metrics

→ **S5**

(Relationships with MD, SMD, RR, OR, and robustness analyses)

Note:
Sections are arranged to allow readers to first access results and interpretations (S1–S3), followed by mathematical formulation and validation (S4–S5).

Supplementary materials are structured into a four-level hierarchy: an external intervention landscape (S1), a structural coordinate system (S1.5), and successive probabilistic and extended representations (S2 and S3).

This structure is intended not only to improve accessibility but also to clarify how different analytical components support the main interpretative framework presented in the primary manuscript.


**Supplementary Section S1. Data underlying the main results**
**S1.1 Disease-specific data (corresponding to Section 3.1 of the main text)**

This section presents the underlying data for the disease-specific re-expressed results reported in Section 3.1 of the main text [4].

The included comparisons consist of acupuncture versus sham acupuncture and acupuncture versus natural course (no acupuncture) across multiple clinical conditions. Standardized mean differences (SMDs) were transformed into the Therapeutic Leverage Ratio (TLR) using the pre-specified approach described in Section S4.

Comparison with sham acupuncture

TLR values compared with sham acupuncture ranged from 1.34 to 4.52 across conditions.

Non-specific musculoskeletal conditions: TLR 1.72

Osteoarthritis: TLR 1.55

Headache: TLR 1.34

Shoulder disorders: TLR 2.81

Back pain: TLR 1.36

Neck pain: TLR 4.52

Comparison with natural course

Compared with natural course, TLR values ranged from 2.22 to 3.13.

Non-specific musculoskeletal conditions: TLR 2.66

Osteoarthritis: TLR 3.13

Headache: TLR 2.22

Back pain: TLR 2.30

Comparator-specific observations

Acupuncture versus penetrating sham: SMD = 0.17, TLR = 1.36

Acupuncture versus non-penetrating sham: SMD = 0.52, TLR = 2.57

Acupuncture versus usual care: SMD = 0.50, TLR = 2.48

Penetrating versus non-penetrating sham: SMD = −0.30, TLR = 0.58

Acupoint versus non-acupoint under penetrating conditions: SMD = −0.02, TLR = 1.02 (0.40–1.88)

Interpretation

These observations indicate that TLR values can exceed 1.0 even when mean differences are small, whereas near-zero differences are associated with TLR values close to unity and wide ranges.

Relation to sensitivity analysis

A subset of these disease categories (low back pain and knee pain) was further examined in sensitivity analyses (Section S1.6) to assess the impact of varying MCID thresholds.

Accordingly, this section presents the baseline disease-specific TLR distributions, while threshold-dependent analyses are reported separately in S1.6.

Note:
These results suggest that TLR distributions vary across disease categories and are dependent on the underlying comparator structure.

**S1.2 Frequency-related data (corresponding to Section 3.2 of the main text)**

This section presents frequency-related TLR values corresponding to Section 3.2 of the main text [5].

The data are derived from migraine-specific acupuncture studies and report TLR values across different treatment frequencies (sessions per week).

Frequency-related TLR values

1 session/week: TLR = 1.00

2 sessions/week: TLR = 1.68

3 sessions/week: TLR = 2.05

4 sessions/week: TLR = 2.25

Observed pattern

In the original studies based on mean differences, a nonlinear (J-shaped) relationship between treatment frequency and outcome was reported.

When the same data are re-expressed using the TLR approach, the values show a monotonic increase within the examined frequency range (up to four sessions per week).

The increase between three and four sessions per week was relatively small compared to earlier increments.

Note:
These results do not introduce new empirical findings but represent a re-expression of previously reported summary statistics.

**S1.3 Comparator-level structure (reference system within TLR representation)**

This section presents data underlying the structural representation of sham acupuncture and related comparator conditions described in Section 3.3 of the main text [6].

Structural representation dataset

All values represent relative positions in the TLR re-expression representation derived from acupuncture comparisons against respective comparator conditions.

These values should be interpreted within the probabilistic structural approach and are not direct pairwise comparisons across interventions.

TLR (Acupuncture vs waitlist): 2.48 (range 2.30–3.10)

TLR (Non-acupoint superficial needling vs waitlist): 1.36 (range 1.15–1.45)

TLR (Acupoint stimulation via toothpick vs waitlist): 1.55 (range n.a.)

Note:
The structural representation describes the relative positioning of comparator conditions within the TLR re-expression representation, rather than a hierarchical ranking of efficacy.

Within this approach, sham acupuncture is represented as a non-inert condition with non-zero probabilistic leverage relative to the reference state.

These values reflect structural positioning within the probabilistic re-expression approach.

**S1.4 Preference-related data (corresponding to Section 3.4 of the main text)**

This section presents preference-related TLR values corresponding to Section 3.4 of the main text [7].

The data describe TLR estimates stratified by preference-response categories under different MCID thresholds.

Preference-related TLR values

Indifference: TLR 1.00

Match: TLR 1.16

Mismatch: TLR 1.01

Observed pattern

Across MCID thresholds, the “match” category consistently shows a higher TLR compared with indifference and mismatch conditions, while the latter two remain close to unity.

Note:
These results represent stratified re-expressions of preference-related data and are intended to describe relative positioning within the TLR approach rather than absolute differences in clinical effect.

Although sham conditions generally occupied intermediate positions within the TLR approach, deviations from this pattern were observed in specific contexts. In particular, variations associated with expectation-related factors may influence the relative positioning of sham conditions within the probabilistic representation (see S-Reference List).

**S1.5 Intervention-level structural representation**

This section presents the TLR values used for the structural representation shown in Figure 2 of the main text [7].

Structural TLR representation (vs waitlist condition)

ANP; Acupoint, non-penetrating contact stimulation: TLR = 1.45

NNP; Non-acupoint, non-penetrating contact stimulation: TLR = 1.35

ASN; Acupoint, superficial needling: TLR = 1.35

NSN; Non-acupoint, superficial needling: TLR = 1.45

NDN; Non-acupoint, deep needling: TLR = 1.15

SES; Sham electroacupuncture stimulation: TLR = 1.30

SLA; Sham laser acupuncture: TLR = 1.25

MA; Manual acupuncture: TLR = 1.65

Structural representation

TLR values for each intervention type ranged from 1.15 to 1.65 within the included datasets.

Sham-related interventions showed values within a relatively narrow range.

Manual acupuncture showed a higher value (TLR = 1.65) compared with other sham-related interventions.

These values correspond to the intervention-level representation shown in Figure 2.

**S1.6 Sensitivity analysis (MCID thresholds)**

This section presents sensitivity analyses evaluating the robustness of TLR under different MCID thresholds (see Table S1).

Analyses were conducted for low back pain and knee pain, using three MCID assumptions (0.3 SD, 0.5 SD, and 0.7 SD) [4].

Low back pain

MCID 0.3 SD (lenient):

Sham: TLR 1.75

No acupuncture: TLR 2.68

MCID 0.5 SD (standard):

Sham: TLR 1.72

No acupuncture: TLR 2.57

MCID 0.7 SD (strict):

Sham: TLR 1.68

No acupuncture: TLR 2.45

Knee pain

MCID 0.3 SD (lenient):

Sham: TLR 2.38

No acupuncture: TLR 4.15

MCID 0.5 SD (standard):

Sham: TLR 2.26

No acupuncture: TLR 3.82

MCID 0.7 SD (strict):

Sham: TLR 2.15

No acupuncture: TLR 3.55

Observed pattern

Across all MCID thresholds, TLR remained directionally consistent, with only minor variation in magnitude.

The relative ordering between comparator conditions remained unchanged.

**Table S1. Sensitivity analysis of TLR across MCID thresholds**
This table presents the results of sensitivity analyses examining the effect of varying MCID thresholds on TLR estimates.

MCID values were varied within clinically reported ranges for each condition. While absolute TLR values changed with different thresholds, the overall pattern of comparator-dependent variation remained consistent.

These results support the robustness of TLR as a probability-based re-expression under plausible variations in clinically meaningful thresholds.

| Condition | TLR range (vs Sham) | TLR range (vs No Acu) |
| --- | --- | --- |
| Low back pain | 1.68-1.75 | 2.45-2.68 |
| Knee pain | 2.15-2.38 | 3.55-4.15 |

**S1.7 Cross-dataset comparison of sham-related configurations within the TLR approach**

This section provides a comparative interpretation of sham-related configurations across S1.1, S1.3, and S1.5.

Although these analyses are derived from independent datasets and are not directly integrated, several consistent tendencies are observed when expressed using TLR.

Across datasets, non-penetrating or contact-based interventions tend to show slightly higher TLR values compared with superficial or penetrating needling in certain configurations. Differences between acupoint and non-acupoint stimulation are generally small, although variability is sometimes substantial depending on the condition.

In S1.1, part of the observed variability in TLR values across disease conditions may reflect not only disease-specific effects, but also differences in sham-related configurations.

In particular, variability in sham interventions themselves (e.g., differences in procedural characteristics such as depth or type of stimulation) may contribute to heterogeneity in comparator responses. This suggests that part of the between-condition variation may reflect variability in sham-related effects, in addition to disease-specific response patterns to acupuncture.

These observations do not imply a unified structural model across datasets. Rather, they indicate that independently derived results can be comparatively interpreted within a shared MCID-based probabilistic approach.

A key point is that these patterns are not clearly observable when only mean differences are considered, but become more apparent under TLR-based probabilistic re-expression.

These findings suggest that variability in TLR values across disease conditions may not be explained solely by disease heterogeneity, but may also partially reflect differences in comparator (sham) conditions.


**Supplementary Section S2. Distributional positioning of acupuncture within the intervention landscape**

A scatter plot (Figure S1) was constructed using Therapeutic Leverage Ratio (TLR) values and associated range measures across 22 interventions derived from Cochrane reviews and related studies, in order to describe the distribution of intervention effects within a broader set of comparative evidence.

The included studies comprise those cited in the main text [9–11], as well as additional studies listed in the S-Reference List.

This figure summarizes how TLR values vary across interventions based on probabilistic re-expression of continuous outcomes.

The observed clustering of TLR values reflects differences in distributional characteristics across interventions; however, no causal interpretation or comparative efficacy ranking is implied.

This figure provides a reference summary of intervention-level TLR distributions under the TLR approach.

***Bridge paragraph (between S2 and S3)***

The analyses in Sections S2 and S3 should be interpreted as complementary perspectives within the same probabilistic re-expression approach.

Section S2 describes the distribution of TLR values across external datasets, whereas Section S3 illustrates how similar TLR-based patterns appear under different comparator configurations within individual datasets.

Together, these analyses distinguish between:

・distributional variation across interventions (S2)
・comparator-dependent variation within datasets (S3)
within the proposed probabilistic re-expression approach.


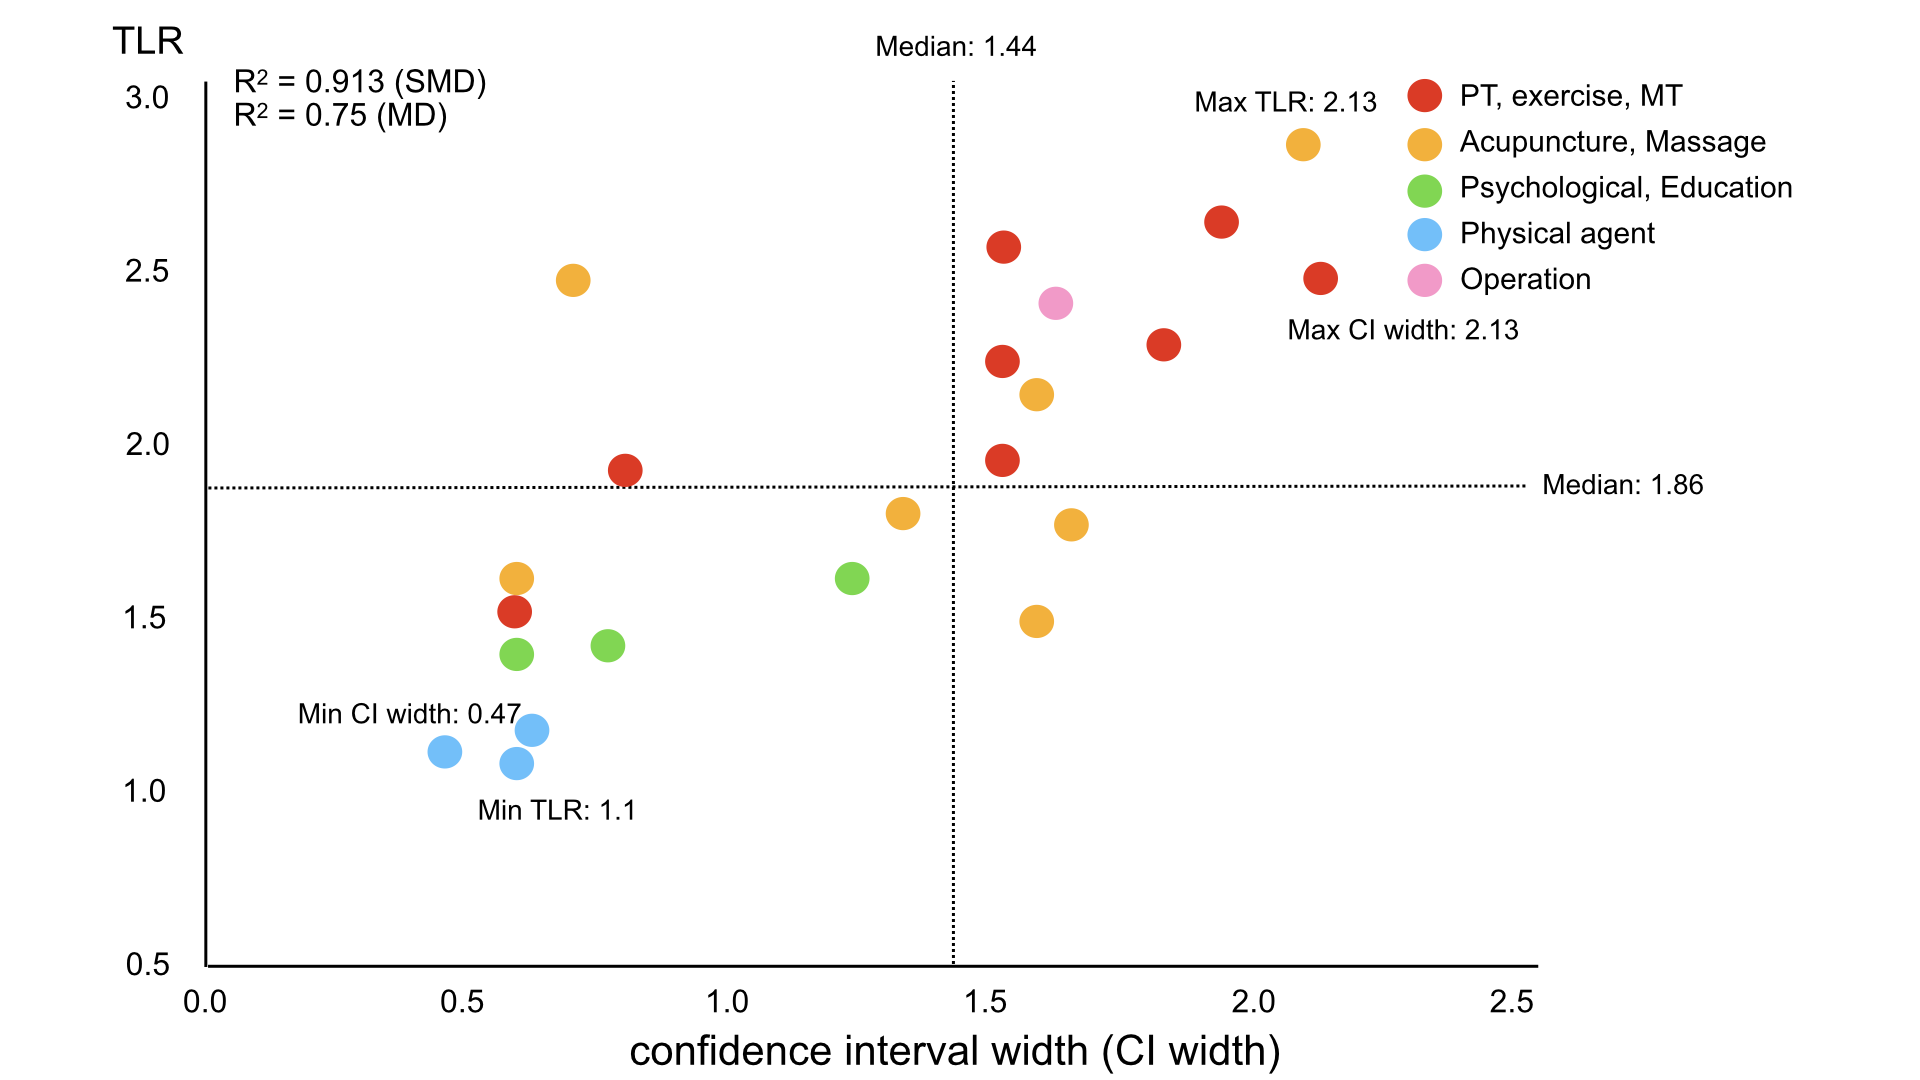
 **Supplementary Figure S1 Distribution of TLR across interventions in Cochrane reviews**

This scatter plot illustrates the distribution of TLR values across multiple interventions reported in Cochrane reviews. Each point represents an intervention–comparator pair, with TLR values derived from reported summary statistics using a consistent MCID-based re-expression.
Each point represents an intervention estimate derived from a study or study arm: Physical therapy, exercise, manual therapy (red), Acupuncture, Massage (yellow), Psychological, Education (green), physical agent (blue), Operation (pink).
Horizontal dashed line indicates median CI width (1.44) and median TLR (1.86).
The overall distribution demonstrates that TLR values typically fall within a moderate range across interventions.
Note:
The number of interventions (n=22) varies across analyses due to differences in the reporting formats of the original Cochrane reviews (e.g., missing primary event rates or standard deviations for certain studies.


“Abbreviations: TLR, Therapeutic leverage ratio; MD, Mean difference; SMD, Standardized mean difference; PT, Physical therapy; MT, Manual therapy.”

**Supplementary Section S3. Alternative representations of factor-based visualization**

This section presents an alternative visualization of comparator configurations using Therapeutic Leverage Ratio (TLR) values derived from the same underlying dataset as S1.5.

The purpose of this representation is to illustrate how differences in comparator conditions are reflected in TLR values across intervention types, rather than to define spatial or geometric relationships.

The analysis is consistent with the framework described in S1.5, but integrates data across multiple studies to show how TLR values vary across comparator configurations.

Across these representations, the relative ordering of TLR values remained consistent, while absolute values varied depending on comparator structure. This indicates that differences between conditions are expressed through variation in TLR values rather than changes in rank.

A dual-axis representation is used to illustrate the relationship between reference conditions and resulting probabilities based on MCID-based re-expression. This is intended as a visualization aid for understanding probabilistic changes, not as a spatial or geometric mapping.

TLR values are displayed using logarithmic scaling to reflect multiplicative differences in effect magnitude.

Sham interventions, including non-acupoint and non-penetrating procedures, generally fall between waitlist conditions and active acupuncture in terms of TLR values, reflecting intermediate probabilistic effects within comparator structures.

These observations indicate that differences in comparator configuration are not simply reflected as rankings of effectiveness, but as systematic variation in TLR values across conditions.

Importantly, these representations should be interpreted as alternative projections of the same underlying data, rather than as spatial structures.

Across all representations, the ordering of TLR values remains stable, supporting the consistency of the probabilistic re-expression approach.

Note:
For illustrative purposes, a change in TLR magnitude may correspond to a shift in the probability of achieving the MCID (e.g., from approximately 50% to 57%), depending on baseline probabilities. This is provided as a conceptual example of probabilistic interpretation.


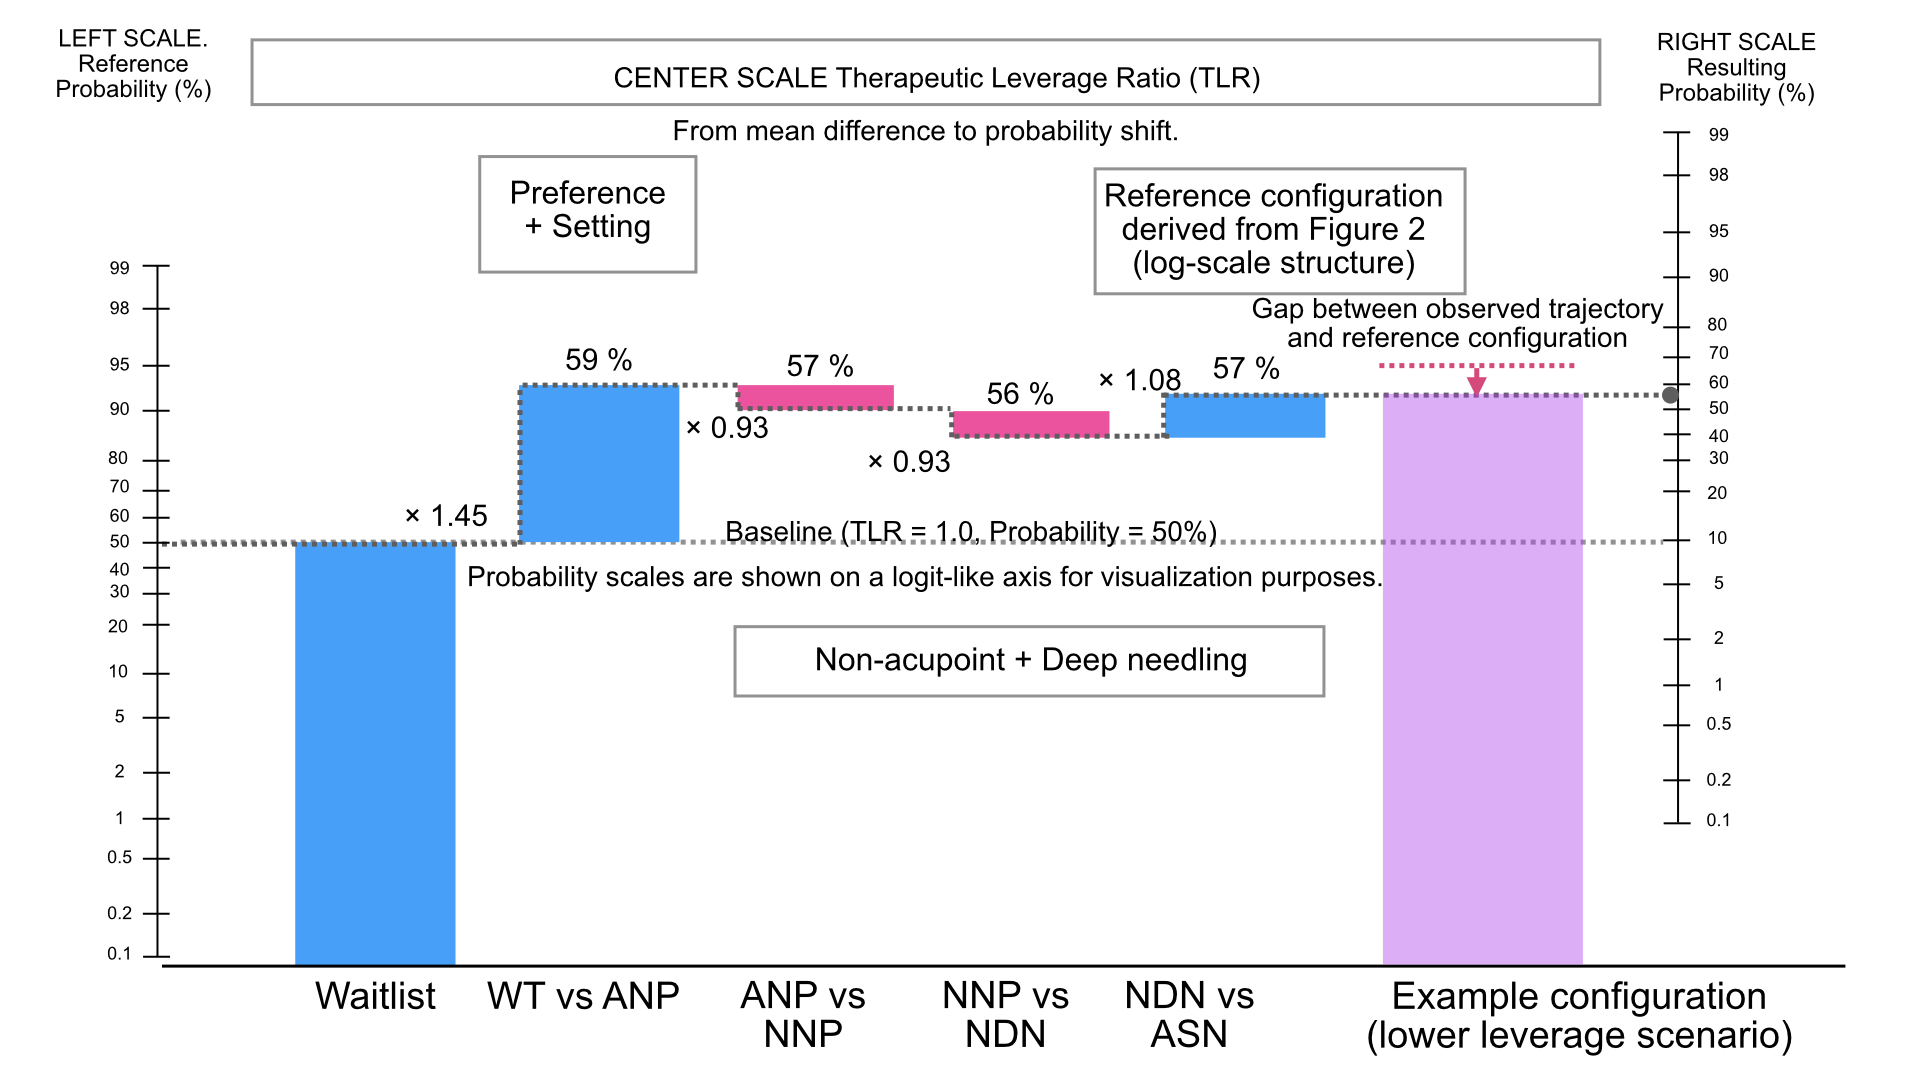
 **Supplementary Figure S2. Structural and probabilistic re-expression of therapeutic leverage using a shared dataset**

This figure presents an alternative representation of the comparator configuration shown in Figure 2 of the main text. Using the same dataset as S1.5, it visualizes structural features and corresponding probabilistic changes in TLR. A nomogram representation is incorporated to explicitly display probabilistic variations associated with structural differences across comparator conditions.

The configuration of Supplementary Figure S2 is as follows:

Baseline (Waitlist): TLR = 1.0

Waitlist vs ANP (non-penetrating at acupoint): TLR = 1.45

NNP (non-penetrating at no acupoint): TLR = 1.35

NDN (depth-needling at no acupoint): TLR = 1.15

ASN (superficial needling at acupoint): TLR = 1.35

TLR values are presented on a logarithmic scale to reflect multiplicative differences. Corresponding probability values are also displayed in the figure to represent their nonlinear re-expression under MCID-based re-expression.

Sham interventions occupy an intermediate position within the comparator structure defined by acupoint location, penetration depth, and procedural characteristics.

These observations indicate that the results do not represent a simple ranking of effects, but rather a mapping within a shared structural space in which comparator-related configurations correspond to different projections of the same underlying system.

Note:
Probability scales are non-linearly related to log-transformed leverage; therefore, bar heights are not linearly comparable across axes. This misalignment reflects the non-linear transformation between multiplicative leverage and probability space. Values below 1.0 indicate attenuation of leverage under specific comparator conditions.

“Abbreviations: TLR, Therapeutic leverage ratio.”

**Supplementary Section S4. Definition of TLR and Probability Re-expression**

**S4.1 Rationale for probability re-expression**

Although individual outcome distributions in clinical pain data are often non-normal, the use of mean-based summary statistics in meta-analytic frameworks is supported by large-sample statistical principles, including the central limit theorem. Accordingly, the normality assumption applied in the probability re-expression is a pragmatic approximation consistent with standard meta-analytic practice rather than an assertion of strict distributional normality at the individual level.

Conventional systematic reviews and meta-analyses commonly use mean difference (MD) and standardized mean difference (SMD) as primary effect measures. These indices describe average treatment effects at the group level and are suitable for assessing whether an intervention shows a mean benefit across a population.

However, these measures do not directly indicate the probability that individual patients achieve a clinically meaningful improvement [1]. As a result, there remains a gap between average treatment effects and clinically interpretable outcomes at the patient level.

In this study, this gap is addressed through a probabilistic re-expression based on MCID as a threshold. By comparing probabilities of achieving MCID between intervention and control conditions, treatment effects are expressed as a ratio of improvement probabilities.

Under this approximation, the focus of the re-expression is not on exact distributional fidelity but on the consistent transformation of relative differences into a probabilistic scale.

**S4.2 Definition of TLR**

Here, P(achieving MCID | group) denotes the probability that the outcome achieves the predefined MCID threshold.

TLR is defined as:

*TLR = P(achieving MCID | intervention) / P(achieving MCID | comparator)*

TLR represents a comparative probabilistic re-expression of treatment effects derived from continuous outcomes. It is not intended as a causal estimator and is mathematically equivalent to a ratio of probabilities under the specified re-expression.

**S4.3 Illustrative computation of TLR using Cochrane migraine data**

This section illustrates the computational procedure of TLR using summary statistics reported in a Cochrane systematic review on acupuncture for episodic migraine prevention [9].

The purpose is to demonstrate the re-expression process from conventional effect measures into probability-based representations. No additional modeling assumptions beyond Section S4.2 are introduced.

**S4.3.1 Data source**

The Cochrane review reports comparisons of acupuncture with:

1. no acupuncture control,
2. sham acupuncture, and
3. prophylactic drug treatment.

For each comparison, standardized mean differences (SMDs) and responder rates (≥50% reduction in headache frequency) were reported.

**S4.3.2 Probability re-expression**

For each comparison, the observed SMD is mapped onto a standard normal distribution under the assumption described in Section S4.2.

The probability of achieving a clinically meaningful improvement is expressed as:

*P(achieving MCID | intervention)
P(achieving MCID | comparator)*
where MCID denotes a fixed clinically interpretable threshold defined in Section S4.2.

**S4.3.3 Calculation of TLR**

TLR is computed as:

*TLR = P(achieving MCID | intervention) / P(achieving MCID | comparator)*

This ratio represents the relative probability of achieving a clinically meaningful improvement between groups.

**S4.3.4 Illustrative example (sham comparison)**

For the comparison between acupuncture and sham acupuncture, the reported effect size is SMD = −0.18.

Under the standard normal re-expression, this corresponds to:

*P(achieving MCID | acupuncture) ≈ 0.571
P(achieving MCID | sham) ≈ 0.465*yielding:

*TLR ≈ 1.23*
**S4.3.5 Responder-based comparison (RR)**

The same dataset reports responder rates defined as ≥50% reduction in headache frequency:

*Acupuncture: 50%
Sham: 41%*
resulting in:

*RR ≈ 1.22*
**S4.3.6 Summary of re-expression**

This example demonstrates that continuous-outcome-based re-expression (SMD → probability → TLR) and binary responder analysis (RR) can be expressed within a consistent probabilistic framework.

Rather than representing competing effect measures, these re-expressions reflect different projections of the same outcome structure under a shared probabilistic representation.

This section is intended as an illustrative example of the computational procedure.

**S4.3.7 Interpretation of TLR**

The interpretation of TLR follows a probability-based comparison:

・TLR = 1 indicates no difference in the probability of achieving a clinically meaningful improvement.
・TLR > 1 indicates a higher probability of improvement in the intervention group.
・TLR < 1 indicates a lower probability of improvement.

The range of TLR values across studies reflects variability across clinical contexts rather than statistical uncertainty.


**Supplementary Section S5. Statistical Properties and Validity of TLR**

**S5.1 Summary table of related metrics**

Relationships with existing metrics (OR, RR, LR, NNT, etc.) are summarized in Table S2 (conceptual relationships) and Table S4 (empirical correspondence).

While the TLR can be expressed in a form analogous to a risk ratio, it is defined with respect to the probability of exceeding a clinically meaningful threshold (MCID), rather than directly observed event rates.

Accordingly, the TLR should not be interpreted as a conventional risk ratio, but as a re-expression of treatment effects within a clinically anchored probabilistic framework.

**Supplementary Table S2. Indicators related to S5 (Statistical properties and comparative metrics)**

This table summarizes the conceptual and structural relationships between the TLR and conventional effect metrics, including OR, RR, NNT, and SMD. The purpose of this comparison is to clarify the positioning of TLR within existing statistical structure and to support interpretability. These relationships are presented descriptively and do not imply equivalence or interchangeability between measures.

| **Indicator** | **Primary Focus** | **Unit** | **Level** | **Advantages** | **Limitations** | **Clinical Interpretation** |
| --- | --- | --- | --- | --- | --- | --- |
| **TLR (Therapeutic Leverage Ratio)** | Amplification of individual probability of achieving MCID | Ratio | Individual level | Re-expresses treatment effects as probability of achieving MCID/ captures both improvement and deterioration / relatively robust to MCID threshold variation | Requires definition of MCID / derived from aggregate data when IPD unavailable / context-dependent | Indicates how much the probability of clinically meaningful improvement is amplified by an intervention (e.g., TLR = 1.5-2.0) |
| **NNT (Number Needed to Treat)** | Population-level treatment efficiency | Number of patients | Population level | Easy to interpret clinically | Does not represent individual probability / cannot separate natural course | Number of patients needed for one additional patient to benefit |
| **OR (Odds Ratio)** | Association between groups | Odds ratio | Statistical measure | Useful for binary outcome analysis | Limited clinical interpretability. Cannot incorporate clinical threshold (MCID) into continuous outcome distributions | Comparison of odds between intervention and control |
| **SMD** | Standardized mean difference | Standard deviation units | Group level | Enables comparison of effect sizes across studies | Does not translate into individual probability / depends on distributional assumptions | Magnitude of difference in group means |
| **Improvement Rate** | Unadjusted proportion of responders | Percentage (%) | Individual-level (unadjusted) | Intuitive and easy to understand | Does not account for control condition / cannot separate natural recovery | Raw proportion of improvement (not necessarily attributable to intervention effect) |

**S5.2 Baseline dependence**

TLR is derived from group-level mean values and standard deviations; therefore, it is structurally influenced by baseline characteristics of the data. However, under consistent distributional assumptions, it may exhibit more stable behavior compared with outcome metrics directly based on event rates.

Accordingly, TLR is not fully independent of baseline conditions, but its dependence may be attenuated under comparable analytical settings.

This sensitivity reflects a structural property of probability-based ratio measures rather than instability of the estimator itself.

This dependence reflects the re-expression from continuous distributions rather than an inherent instability of the metric itself.

**S5.3 Analytical approach**
Associations between TLR and conventional effect metrics (MD and SMD) were examined using regression analyses.

Relationships between TLR and continuous effect metrics were explored using linear regression, including regression analyses using log-transformed data to assess model fit. Associations between TLR and probability-based metrics (RR and NNT) were assessed using Pearson and Spearman correlation coefficients. Relationships with odds ratios (OR) were also assessed descriptively across comparator conditions.

Sensitivity analyses were additionally performed using an independent external dataset to examine the robustness of MCID-based probability re-expression across alternative data sources.

Statistical analyses were performed using StatView version 5.0 (SAS Institute, Cary, NC, USA). Influence diagnostics (Cook’s distance) were conducted separately using IBM SPSS Statistics.

Note on alternative threshold specification.

An alternative formulation could define the re-expression threshold in standardized distribution space (e.g., a zero-centered threshold), rather than using fixed clinically defined MCID values. This approach was not adopted in the present study, as the objective was probabilistic re-expression using clinically interpretable thresholds while preserving computational simplicity across datasets.

**S5.4 Relationship with SMD and MD**

In this analysis, correlation between TLR and conventional effect measures (SMD and MD) was examined, and consistently strong correlations were observed (See Table S3). However, a single outlying observation was identified in the SMD dataset (SMD = 0.83, TLR = 4.52), and sensitivity analysis indicated that this point exceeded a Cook’s distance of 0.16.

Accordingly, re-analysis excluding this observation showed improved model fit, with R² increasing from 0.849 to 0.867 in the linear regression model, and from 0.913 to 0.934 in the log-transformed model.

For MD, no influential outliers were identified; therefore, sensitivity analysis was not performed. For MD, R² values were 0.649 for the linear regression model and 0.750 for the log-transformed model.

Overall, these results indicate that the relationship between TLR and conventional effect measures is relatively robust and not substantially influenced by individual outlying observations. In addition, the improvement in model fit under log-transformed models suggests that these relationships may include non-linear characteristics.

Associations with probability-based metrics (RR, OR, and NNT) are summarized descriptively in Table S4, consistent with the analytical approach described above.

Despite minor non-linearities, the overall consistency indicates that TLR preserves the relative structure of treatment effects observed with conventional metrics.

**Supplementary Table S3. Correlation between TLR and conventional effect metrics**

This table summarizes the relationships between the TLR and conventional effect metrics, including MD and SMD.

SMD values were standardized such that positive values consistently indicated improvement, allowing direct comparison with TLR.

The results demonstrate a nonlinear relationship between mean-based effect sizes and probability-based representations, consistent with the interpretation of TLR as a re-expression of continuous outcomes into clinically interpretable probabilities. These relationships reflect mathematical re-expression properties between continuous effect measures and probability-based representations, rather than interchangeability of effect measures.

Note:

The number of interventions (MD: n=19; SMD: n=25) varies across analyses due to differences in reporting formats across the original Cochrane reviews (e.g., missing event rates or standard deviations in some studies).
For correlation analyses, SMD values were standardized such that positive values consistently indicated clinical improvement.

| **MD data with ln(MD)** | | |  | **SMD data with ln(SMD)** | | |
| --- | --- | --- | --- | --- | --- | --- |
| **TLR** | **MD** | **ln(MD)** |  | TLR | **SMD** | **ln(SMD)** |
| 2.52 | 15.1 | 2.7147 |  | 2.43 | 0.49 | -0.7133 |
| 1.92 | 11.5 | 2.4423 |  | 2.45 | 0.57 | -0.5621 |
| 1.73 | 9.2 | 2.2192 |  | 2.21 | 0.44 | -0.821 |
| 1.42 | 5.5 | 1.7047 |  | 1.48 | 0.23 | -1.4697 |
| 2.05 | 12.1 | 2.4932 |  | 2.38 | 0.48 | -0.734 |
| 2.40 | 14.5 | 2.6741 |  | 2.25 | 0.4 | -0.9163 |
| 2.62 | 16.2 | 2.785 |  | 1.85 | 0.45 | -0.7985 |
| 1.62 | 2.1 | 0.7419 |  | 2.65 | 0.67 | -0.4005 |
| 1.12 | 3.4 | 1.2238 |  | 1.95 | 0.55 | -0.5978 |
| 1.18 | 10.1 | 2.3125 |  | 1.72 | 0.3 | -1.204 |
| 1.82 | 7.35 | 1.9947 |  | 1.53 | 0.23 | -1.4697 |
| 1.51 | 7.29 | 1.9865 |  | 1.59 | 0.25 | -1.3863 |
| 1.51 | 1.2 | 0.1823 |  | 1.33 | 0.15 | -1.8971 |
| 1.62 | 1.67 | 0.5128 |  | 1.72 | 0.3 | -1.204 |
| 1.90 | 9 | 2.1972 |  | 2.37 | 0.52 | -0.6539 |
| 1.60 | 6 | 1.7918 |  | 1.72 | 0.3 | -1.204 |
| 1.50 | 5 | 1.6094 |  | 1.55 | 0.24 | -1.4271 |
| 1.40 | 4 | 1.3863 |  | 1.34 | 0.16 | -1.8326 |
| 1.10 | 1 | 0 |  | 2.81 | 0.57 | -0.5621 |
|  |  |  |  | 1.36 | 0.17 | -1.772 |
|  |  |  |  | 4.52 | 0.83 | -0.1863 |
|  |  |  |  | 2.66 | 0.54 | -0.6162 |
|  |  |  |  | 3.13 | 0.63 | -0.462 |
|  |  |  |  | 2.22 | 0.44 | -0.821 |
|  |  |  |  | 2.3 | 0.46 | -0.7765 |

**Supplementary Table S4. Intervention-level data and correlation analyses relating TLR to derived probability-based measures.**
This table summarizes the relationships between the TLR and derived probability-based measures, including OR, RR, and NNT.

Associations are presented descriptively to illustrate the mathematical and probabilistic correspondence between TLR and existing metrics. TLR shows direct correspondence with OR and RR, while showing an inverse relationship with NNT.

These comparisons are intended to support interpretability and do not imply that these measures are interchangeable for inference or clinical decision-making.

Note:

The number of interventions (n=25) varies across analyses due to differences in reporting formats across the original Cochrane reviews (e.g., missing event rates or standard deviations in some studies).
OR and LR+ show mathematical correspondence with TLR under the re-expression approach used in this study.

| **Intervention** | **Disease** | **TLR+** | **Estimate RR (relative risk): P=10%** | **RR: P=25%** | **RR: P=50%** | **Estimate NNT (Number Needed to Treat) : P=10%** | **NNT: P=25%** | **NNT: P=50%** |
| --- | --- | --- | --- | --- | --- | --- | --- | --- |
| **Exercise** | NSLBP | 2.52 | 2.19 | 1.83 | 1.43 | 8.4 | 4.8 | 7.1 |
| **Manual therapy** | NSLBP | 1.92 | 1.76 | 1.56 | 1.32 | 13.2 | 7.1 | 11 |
| **Acupuncture** | NSLBP | 1.73 | 1.61 | 1.46 | 1.27 | 16.4 | 8.6 | 13.6 |
| **Education** | NSLBP | 1.42 | 1.36 | 1.28 | 1.17 | 27.6 | 14.1 | 23.6 |
| **Multidisciplinary** | NSLBP | 2.05 | 1.85 | 1.62 | 1.34 | 11.7 | 6.4 | 9.8 |
| **Yoga** | NSLBP | 2.4 | 2.11 | 1.78 | 1.41 | 9 | 5.1 | 7.6 |
| **Pilates** | NSLBP | 2.62 | 2.26 | 1.87 | 1.45 | 7.9 | 4.6 | 6.8 |
| **Mindfulness** | NSLBP | 1.62 | 1.52 | 1.4 | 1.24 | 19.3 | 10 | 15.8 |
| **Traction** | NSLBP | 1.12 | 1.11 | 1.09 | 1.06 | 92.2 | 45 | 81.3 |
| **TENS** | NSLBP | 1.18 | 1.16 | 1.13 | 1.08 | 63.8 | 30.5 | 54.1 |
| **Exercise** | Osteoarthritis | 2.43 | 2.13 | 1.79 | 1.41 | 8.8 | 5.1 | 7.5 |
| **Acupuncture** | Neck pain | 1.82 | 1.68 | 1.51 | 1.3 | 14.6 | 7.8 | 12.3 |
| **Massage** | LBP | 2.45 | 2.14 | 1.8 | 1.42 | 8.7 | 5 | 7.4 |
| **Operation** | Hernia | 2.21 | 1.97 | 1.7 | 1.38 | 10.3 | 5.8 | 8.6 |
| **Acupuncture** | TTH | 2.12 | 1.91 | 1.65 | 1.35 | 11 | 6.1 | 9.3 |
| **Acupuncture** | COPD | 2.85 | 2.4 | 1.95 | 1.48 | 7.1 | 4.2 | 6.1 |
| **Acupuncture** | Depression | 1.48 | 1.41 | 1.32 | 1.19 | 24.3 | 12.5 | 20.4 |
| **Physical Therapy** | Stroke | 2.38 | 2.09 | 1.77 | 1.4 | 9.2 | 5.2 | 7.8 |
| **High-exercise** | Parkinson | 2.25 | 2 | 1.71 | 1.38 | 10 | 5.6 | 8.4 |
| **Physical Therapy** | Coronary | 2.6 | 2.24 | 1.86 | 1.44 | 8 | 4.6 | 6.9 |
| **Exercise** | LBP | 1.9 | 1.74 | 1.55 | 1.31 | 13.5 | 7.3 | 11.2 |
| **Acupuncture** | LBP | 1.6 | 1.51 | 1.39 | 1.23 | 19.8 | 10.2 | 16.2 |
| **Manual therapy** | LBP | 1.5 | 1.43 | 1.33 | 1.2 | 23.3 | 12 | 19.4 |
| **Psychotherapy** | LBP | 1.4 | 1.35 | 1.27 | 1.17 | 29 | 14.8 | 24.9 |
| **Physical agents** | LBP | 1.1 | 1.09 | 1.08 | 1.05 | 111.1 | 53 | 96 |
|  |  |  |  |  |  |  |  |  |
| **Measure** | **Pearson correlation (r)** | **Spearman rank correlation (p)** | **Interpretation** |  |  |  |  |  |
| **RR (Baseline risk = 10%)** | 0.999 | 1 | Extremely high positive correlation |  |  |  |  |  |
| **RR (Baseline risk = 25%)** | 0.996 | 1 | Extremely high positive correlation |  |  |  |  |  |
| **RR (Baseline risk = 50%)** | 0.976 | 1 | Extremely high positive correlation |  |  |  |  |  |
| **NNT (Baseline risk = 10%)** | -0.654 | -1 | Strong inverse correlation |  |  |  |  |  |
| **NNT (Baseline risk = 25%)** | -0.738 | -1 | Strong inverse correlation |  |  |  |  |  |
| **NNT (Baseline risk = 50%)** | -0.849 | -1 | Strong inverse correlation |  |  |  |  |  |
| **Footnote:** Relative risk (RR) and number needed to treat (NNT) were derived under assumed baseline risks of 10%, 25%, and 50%.  By definition, TLR is mathematically equivalent to likelihood ratio (LR+) and odds ratio (OR) under the transformation framework used in this study; therefore, these measures are not presented as independent correlation analyses.  The inverse correlation observed for NNT reflects the expected inverse relationship between treatment leverage and the number needed to treat. | | | | | | | | |

**S5.5 Interpretation of statistical consistency**

Overall, TLR demonstrates coherent statistical behavior across different conventional effect metrics while maintaining its structure as a probability-based ratio derived from continuous outcomes.
This section describes statistical consistency and does not imply causal interpretation or estimator equivalence.


**Supplementary Conclusion**

This supplementary material provides detailed information on the calculation, reproducibility, and transparency of the TLR.

It is designed to complement the main text by supporting both interpretation and verification of the analyses presented in this study.

**S-Reference List (included studies)**
Garcia MK, Meng Z, Rosenthal, et al. Effect of True and Sham Acupuncture on Radiation-Induced Xerostomia Among Patients With Head and Neck Cancer: A Randomized Clinical Trial. JAMA Netw Open. 2019;2(12):e1916910. doi: 10.1001/jamanetworkopen.2019.16910.

Fransen M, McConnell S, Harmer AR, et al. Exercise for osteoarthritis of the knee. Cochrane Database Syst Rev. 2015;1:CD004376. doi: 10.1002/14651858.CD004376.pub3.

Furlan AD, Giraldo M, Baskwill A, et al. Massage for low-back pain. Cochrane Database Syst Rev. 2015;9:CD001929. doi: 10.1002/14651858.CD001929.pub3.

Jacobs WC, van Tulder M, Arts M, et al. Surgery versus conservative management of sciatica due to a lumbar herniated disc: a systematic review. Eur Spine J. 2011;20(4):513-22. doi: 10.1007/s00586-010-1603-7.

Suzuki M, Muro S, Ando Y, et al. A randomized, placebo-controlled trial of acupuncture in patients with chronic obstructive pulmonary disease (COPD): the COPD-acupuncture trial (CAT). Arch Intern Med. 2012;172(11):878-86. doi: 10.1001/archinternmed.2012.1233.

Smith CA, Armour M, Lee MS, et al. Acupuncture for depression. Cochrane Database Syst Rev. 2018:3(3):CD004046. doi: 10.1002/14651858.CD004046.pub4.

Thieme H, Morkisch N, Mehrholz J, et al. Mirror therapy for improving motor function after stroke. Cochrane Database Syst Rev. 2018;7:CD008449. doi: 10.1002/14651858.CD008449.pub3.

Ernst M, Folkerts AK, Gollan R, et al. Physical exercise for people with Parkinson's disease: a systematic review and network meta-analysis. Cochrane Database Syst Rev. 2023;1:CD013856. doi: 10.1002/14651858.CD013856.pub2.

Anderson L, Oldridge N, Thompson DR, et al. Exercise-based cardiac rehabilitation for coronary heart disease: Cochrane Systematic Review and Meta-Analysis. J Am Coll Cardiol. 2016;67(1):1-12. doi: 10.1016/j.jacc.2015.10.044.

Cashin AG, Furlong BM, Kamper SJ, et al. Analgesic effects of non-surgical and non- interventional treatments for low back pain: a systematic review and meta-analysis of placebo-controlled randomised trials. BMJ Evid Based Med. 2025 Mar 18. doi: 10.1136/bmjebm-2024-112974.

Cook RJ, Sackett DL. The number needed to treat: a clinically useful measure of treatment effect. BMJ. 1995;310(6977):452–454. doi:10.1136/bmj.310.6977.452.

A complete list of included Cochrane reviews is provided in the Supplementary Materials.
